# Supplementary material for: Sandy soil reclamation technologies to improve crop productivity and soil health: a review
Source: Frontiers journal article supplement (doi:10.3389/fsoil.2024.1345895), 2024-04-12
Supplement: Table_1.docx [file Table_1.docx]

**Appendix A.** List of the 42 sandy soil reclamation technologies and the respective number of studies reviewed.

| **Technology (no. of papers)** | **Technology (no. of papers)** | **Technology (no. of papers)** |
| --- | --- | --- |
| Biochar (66) | Chelated calcium (1) | Nicotinamide and humic acid (1) |
| Organic amendments (23) | Compaction (1) | Organic amendments combined with biochar (1) |
| Bentonite (5) | Cover cropping (1) | Organic amendments, gypsum, sulfur, and rock phosphate (1) |
| Organic amendments and biochar (5) | Deep ripping (1) | Polyacrylamide and bentonite (1) |
| Soft rock (4) | Fly ash and Polyacrylamide (1) | Polyacrylamide, bentonite, and organic amendments (1) |
| Humic substances (3) | Guilspare (1) | Polyacrylamide, bentonite, gypsum, sulfur, and rock phosphate (1) |
| Fly ash (2) | Gypsum (1) | Polyacrylamide, bentonite, organic amendments, gypsum, sulfur, and rock phosphate (1) |
| Superabsorbent polymers (2) | Gypsum combined with calcium nitrate (1) | Polyacrylamide (1) |
| Algae (1) | Gypsum, sulfur, and rock phosphate (1) | Red mud (1) |
| Arsenic sandstone (1) | Hydrochar-based rhizobium (1) | Soil water retention barriers (1) |
| Banded wetting agent (1) | Liming (1) | Sulfur-coated urea (1) |
| Biochar and soft rock (1) | Nano-technology calcium nitrate (1) | Sulfur-coated urea and algae (1) |
| Biochar combined and lignite fly ash (1) | Nano-technology zeolite phosphorus (1) | Super-absorbent polymers combined with bentonite (1) |
| Calcium nitrate (1) | Nicotinamide (1) | Termite mound (1) |
